# Supplementary material for: A Conjugate between Lqh-8/6, a Natural Peptide Analogue of Chlorotoxin, and Doxorubicin Efficiently Induces Glioma Cell Death
Source: MDPI journal article supplement (doi:10.3390/biomedicines10102605), 2022-10-17
Supplement: s1 [file s1]

# A Conjugate between Lqh-8/6, a Natural Peptide Analogue of Chlorotoxin, and Doxorubicin Efficiently Induces Glioma Cell Death

Lucie Dardevet <sup>1,2</sup>, Feten Najlaoui <sup>3</sup>, Sonia Aroui <sup>4</sup>, Mayeul Collot <sup>5</sup>, Céline Tisseyre <sup>2,6</sup>, Michael W. Pennington <sup>7</sup>, Jean-Maurice Mallet <sup>8</sup> and Michel De Waard <sup>1,2,9,\*</sup>

<sup>1</sup> L'institut du Thorax, Nantes Université, CNRS, INSERM, 44000 Nantes, France; lucie.dardevet@gmail.com

<sup>2</sup> LabEx "Ion Channels, Science & Therapeutics", 06560 Valbonne, France; celine.tisseyre@cea.fr

<sup>3</sup> Laboratoire des Venins et Biomolécules Thérapeutiques LR11IPT08, Institut Pasteur de Tunis, Tunis 1002, Tunisia; fatennajlaoui@yahoo.fr

<sup>4</sup> Laboratory of Biochemistry, Molecular Mechanisms and Diseases Research Unit, UR12ES08, Faculty of Medicine, University of Monastir, Monastir 09023, Tunisia; sonia\_aroui2002@yahoo.fr

<sup>5</sup> Laboratoire de Bioimagerie et Pathologies, UMR CNRS 7021, 74 Route du Rhin, CS 60024, 67401 Illkirch, France; mayeul.collot@unistra.fr

<sup>6</sup> Université Grenoble Alpes, 621 Avenue Centrale, 38400 Saint-Martin d'Hères, France

<sup>7</sup> AmbioPharm Inc., 1024 Dittman Crt, North Augusta, SC 29842, USA; mike.pennington@ambioPharm.com

<sup>8</sup> Laboratoire des Biomolécules, Ecole Normale Supérieure, PSL University, Sorbonne University, CNRS UMR 7203, 75005 Paris, France; jean-maurice.mallet@ens.psl.eu

<sup>9</sup> Smartox Biotechnology, 6 Rue des Platanes, 38120 Saint-Egrève, France

\* Correspondence: michel.dewaard@univ-nantes.fr or dewaard@smartox-biotechnology.com; Tel.: +33-228-080-076

## Supplementary Data

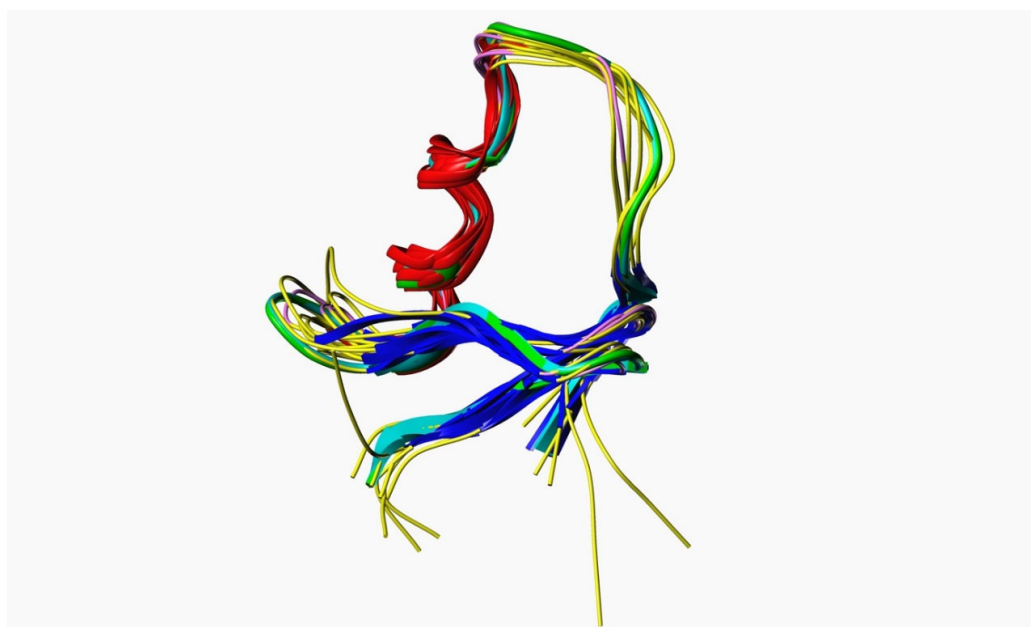

**Figure S1.** Overlay of the secondary structures of chlorotoxin and chlorotoxin-like peptides. Chlorotoxin is in cyan and Lqh-8/6 in green. The other peptides have the helix alpha in red, and the  $\beta$ -sheet structure is in blue.

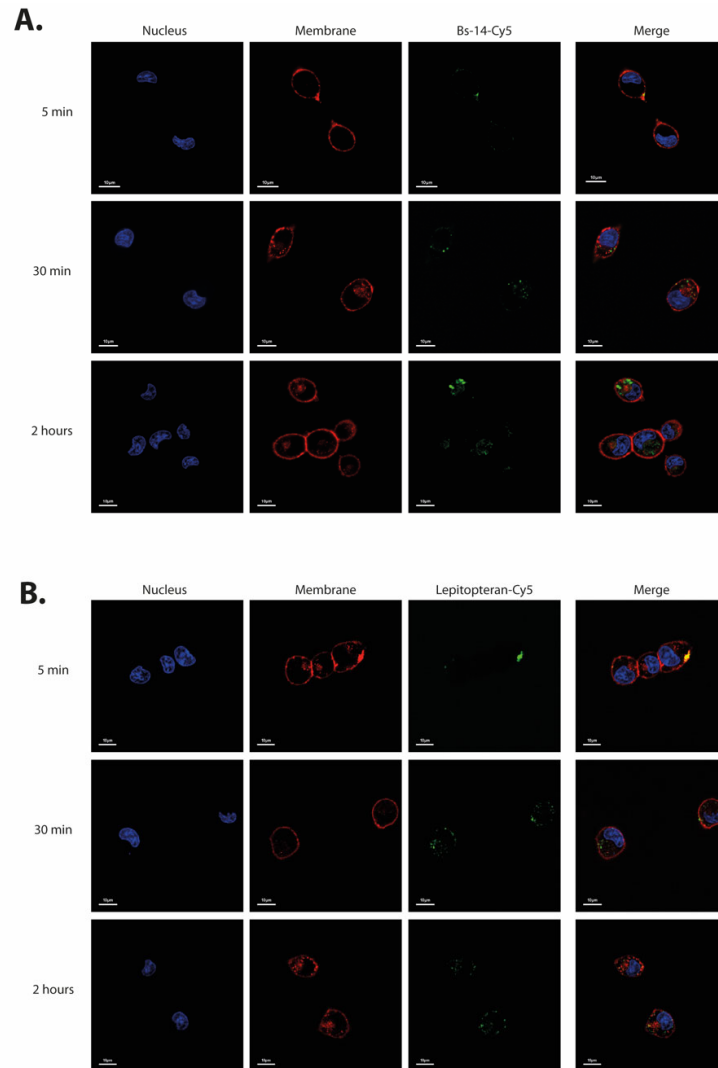

**Figure S2.** GBM F98 labelling with BS-14<sub>b</sub> or lepidopteran<sub>b</sub>. **(A)** Confocal microscopy images illustrating the cell surface labeling and penetration of BS-14-strep-Cy5 into glioma F98 cells (red color). Incubation times were 5, 30 min and 2 hrs. Images were taken immediately after washout of the extracellular peptide. The plasma membrane is labeled with concanavalin-A-rhodamine (green color); the nucleus is labeled with Hoechst 34580 (blue color). **(B)** Confocal microscopy images illustrating the penetration of lepidopteran<sub>b</sub>-strep-Cy5 into glioma F98 cells. Same conditions as in **(A)**.

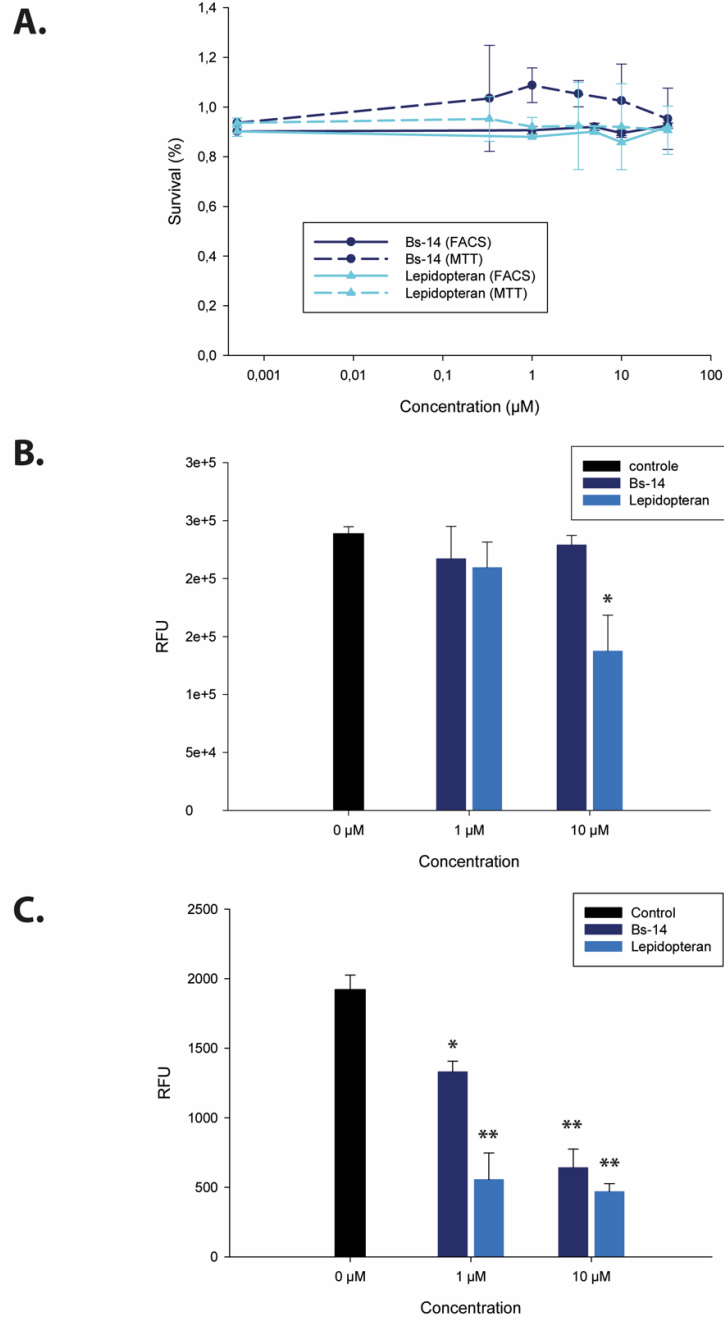

**Figure S3.** Functional effects of BS-14 and lepidopteran onto F98 cells in culture. **(A)** Lack of cell toxicity of BS-14 and lepidopteran as assessed by MTT assay and FACS. FACS toxicity results are represented by full lines, whereas MTT results are shown with dashed lines. **(B)** Effect of BS-14 and lepidopteran on F98 cell migration. **(C)** Effect of BS-14 and lepidopteran on F98 cell invasion. \*,  $p \leq 0.07$ ; \*\*,  $p \leq 0.05$ .
